# Supplementary material for: Optimization of the RAFT polymerization conditions for the in situ formation of nano-objects via dispersion polymerization in alcoholic medium
Source: Royal Society of Chemistry journal article supplement (doi:10.1039/c4py00855c), 2014-08-28
Supplement: c4py00855c1.pdf [file c4py00855c1.pdf]

## Supplementary Information

### Optimization of the RAFT Polymerization Conditions for the *in Situ* Formation of Nano-objects via Dispersion Polymerization in Alcoholic Medium

Wei Zhao,<sup>1</sup> Guillaume Gody,<sup>2</sup> Siming Dong,<sup>4</sup> Per B. Zetterlund<sup>4</sup> and Sébastien Perrier<sup>2,3\*</sup>

<sup>1</sup> *Key Centre for Polymers & Colloids, School of Chemistry, Building F11, The University of Sydney, NSW 2006, Australia.*

<sup>2</sup> *Department of Chemistry, The University of Warwick, CV4 7AL, UK.*

<sup>3</sup> *Faculty of Pharmacy and Pharmaceutical Sciences, Monash University, VIC 3052, Australia*

<sup>4</sup> *Centre for Advanced Macromolecular Design (CAMD), School of Chemical Engineering, The University of New South Wales, Sydney, New South Wales 2052, Australia*

Correspondence to Tel: +44 (0)2476 528085; Fax: +44 (0)2476 524112;

E-mail: [s.perrier@warwick.ac.uk](mailto:s.perrier@warwick.ac.uk)

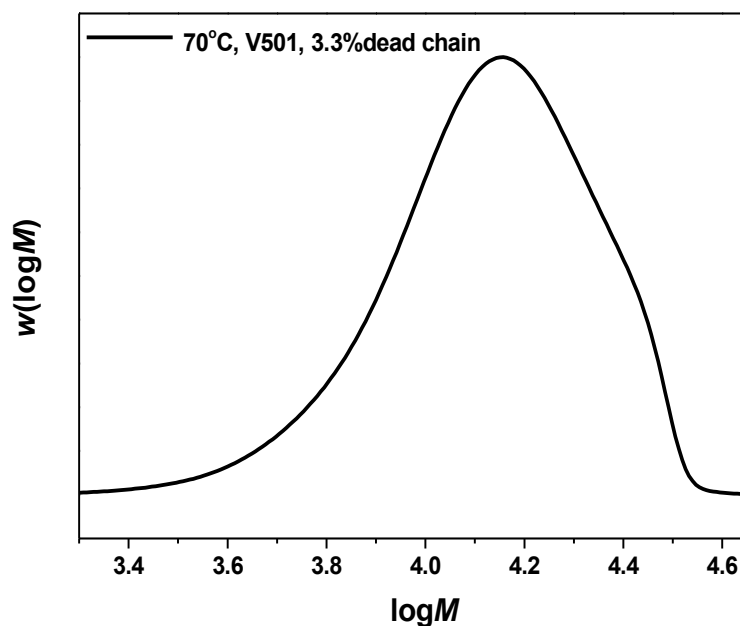

Figure S1. SEC chromatogram ( $w(\log M)$  vs.  $\log M$ ) of P(PEGA<sub>454</sub>)-TTC macro-RAFT agent obtained by RAFT polymerization at 70°C in dioxane. [PEGA<sub>454</sub>]<sub>0</sub>: [PABTC]<sub>0</sub>: [V501]<sub>0</sub> = 60 : 1 : 0.1. DMF was used as the eluent.

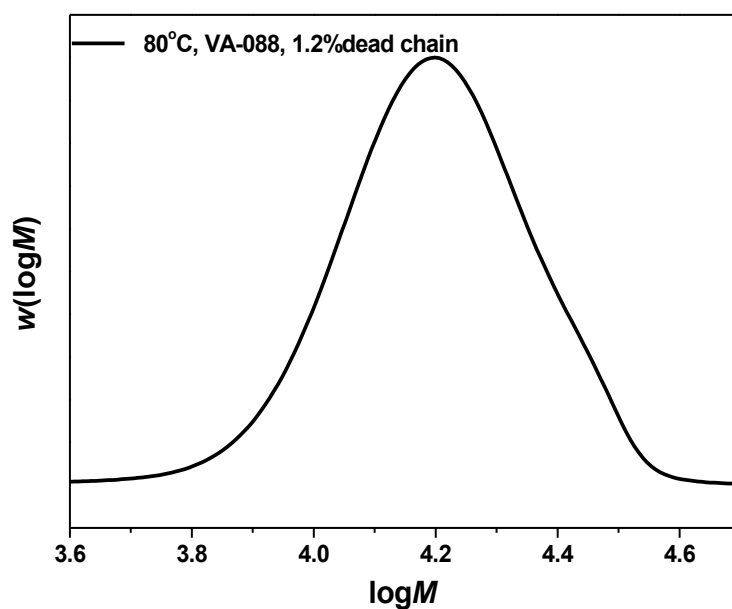

Figure S2. SEC chromatogram ( $w(\log M)$  vs.  $\log M$ ) of P(PEGA<sub>454</sub>)-TTC macro-RAFT agent obtained by RAFT polymerization at 80 °C in dioxane. [PEGA<sub>454</sub>]<sub>0</sub>: [PABTC]<sub>0</sub>: [VA-088]<sub>0</sub> = 60 : 1 : 0.1. DMF was used as the eluent.

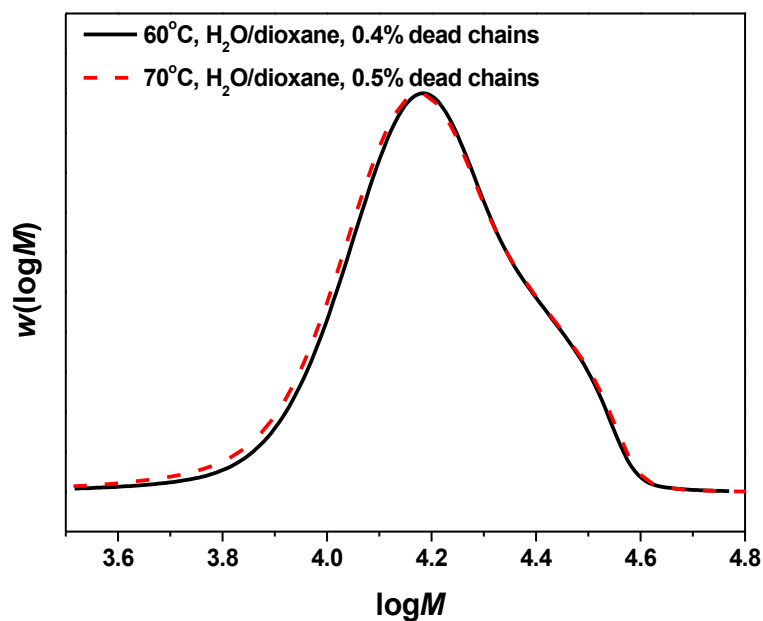

Figure S3. SEC chromatograms ( $w(\log M)$  vs.  $\log M$ ) of P(PEGA<sub>454</sub>)-TTC macro-RAFT agent obtained by RAFT polymerization at 60 °C, [PABTC]<sub>0</sub> : [V501]<sub>0</sub> = 8 (straight line) and 70 °C, [PABTC]<sub>0</sub> : [V501]<sub>0</sub> = 34 (dashed line) in H<sub>2</sub>O : dioxane = 9 : 1, [PEGA<sub>454</sub>]<sub>0</sub> : [PABTC]<sub>0</sub> = 60 : 1. DMF was used as the eluent.

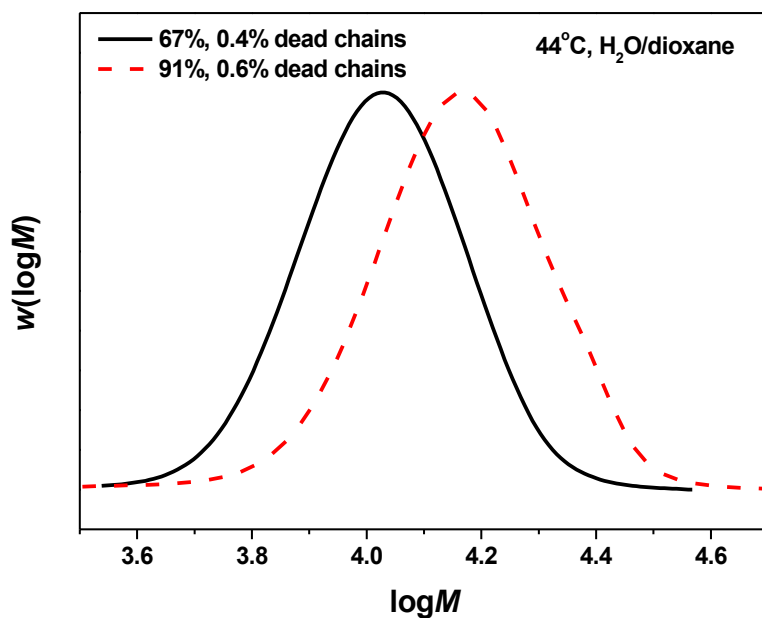

Figure S4. SEC chromatograms ( $w(\log M)$  vs.  $\log M$ ) of P(PEGA<sub>454</sub>)-TTC macro-RAFT agent obtained by RAFT polymerization at 44 °C in H<sub>2</sub>O : dioxane = 9 : 1, [PEGA<sub>454</sub>]<sub>0</sub> : [PABTC]<sub>0</sub> : [VA-044]<sub>0</sub> = 60 : 1 : 0.03. DMF was used as the eluent.
